# Supplementary figures and images for: Methane adsorption and methanol desorption of copper modified boron silicate
Source: Royal Society of Chemistry journal article supplement (doi:10.1039/c8ra08038k), 2018-01-01

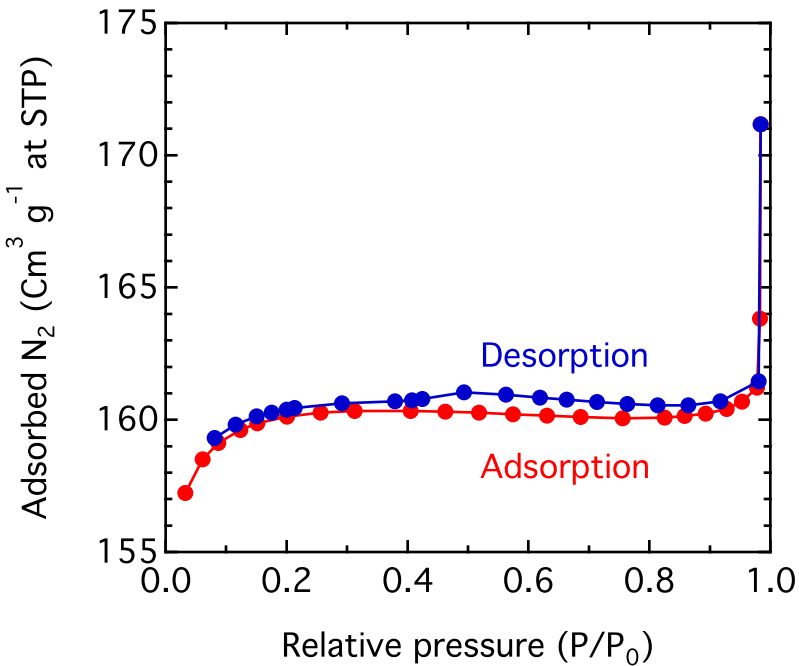

Supplement: c8ra08038k1.zip [file c8ra08038k1.zip]

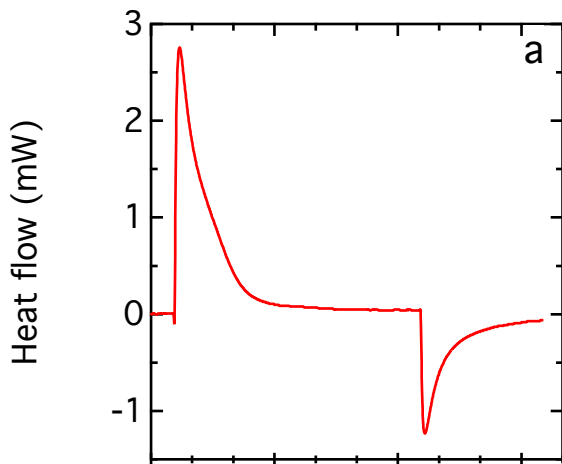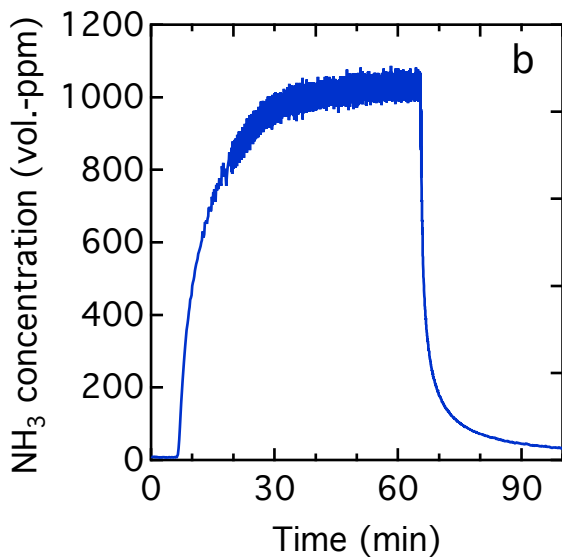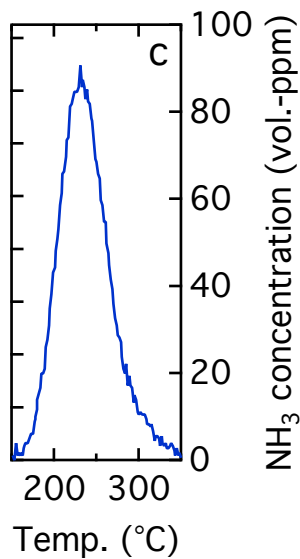

Supplement: c8ra08038k1.zip [file c8ra08038k1.zip]

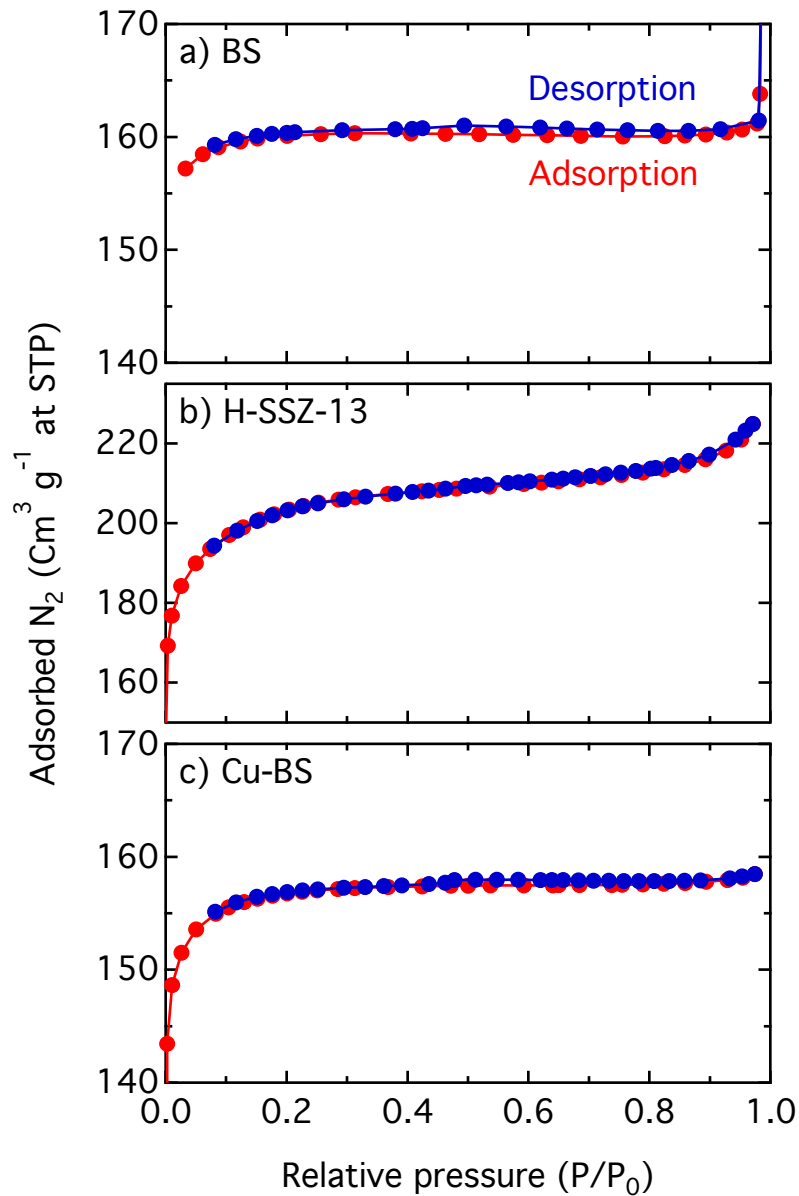

Supplement: c8ra08038k1.zip [file c8ra08038k1.zip]

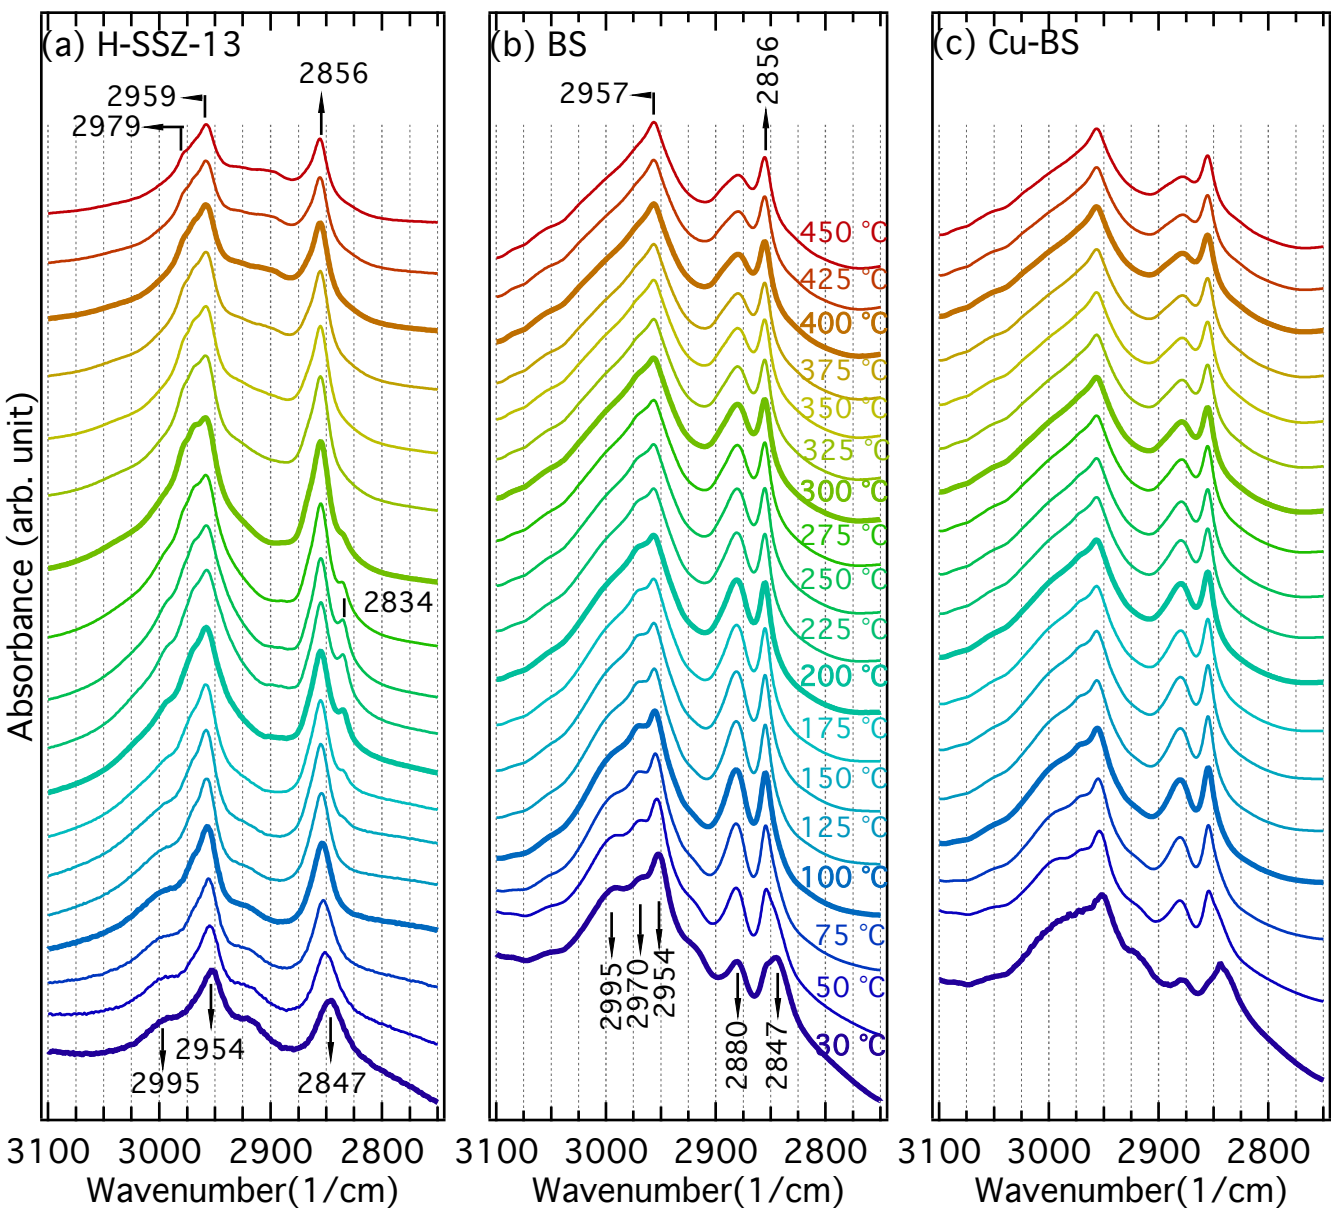

Supplement: c8ra08038k1.zip [file c8ra08038k1.zip]

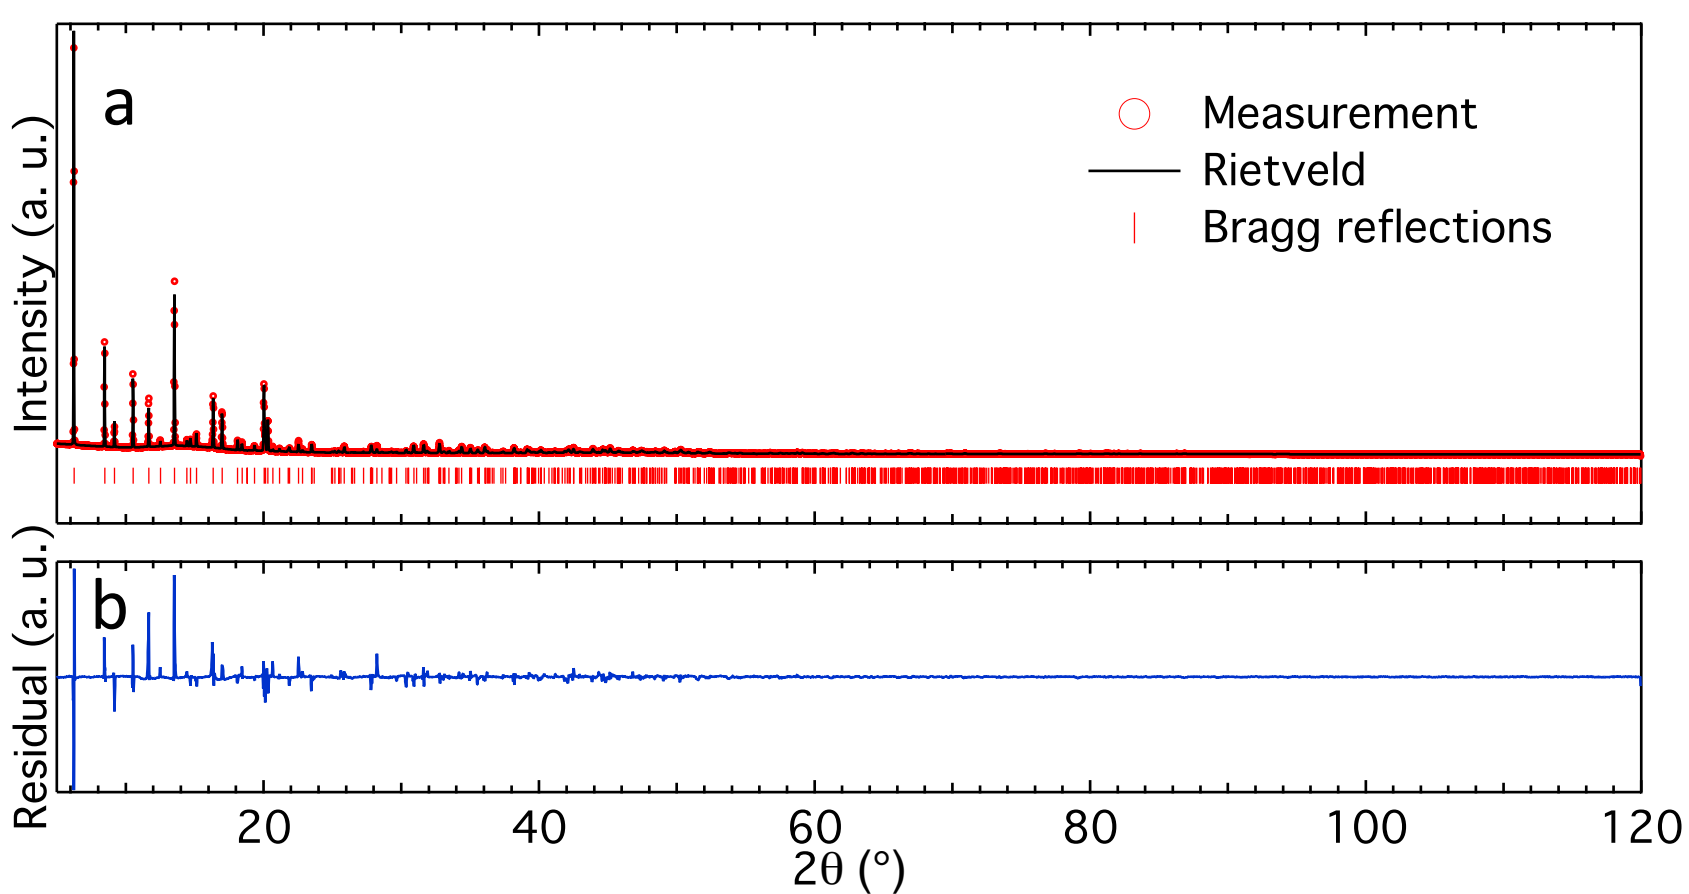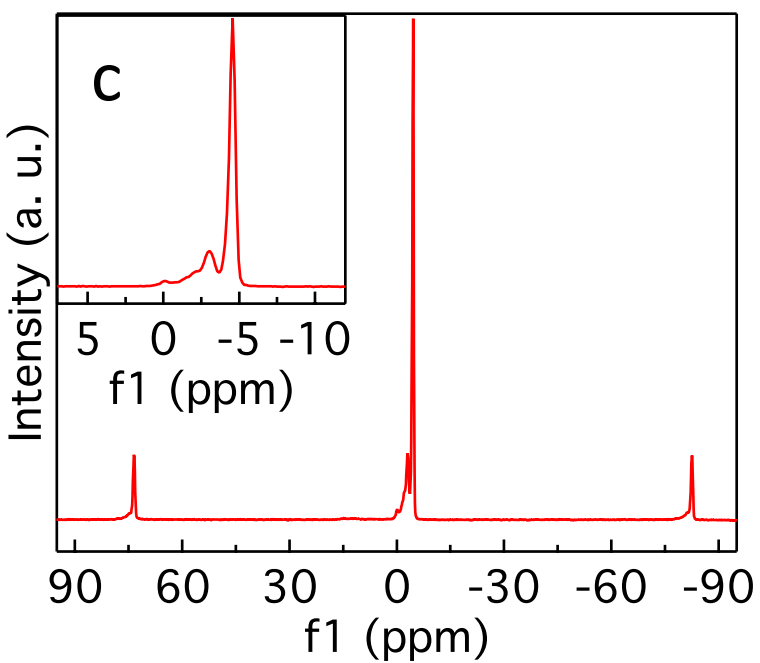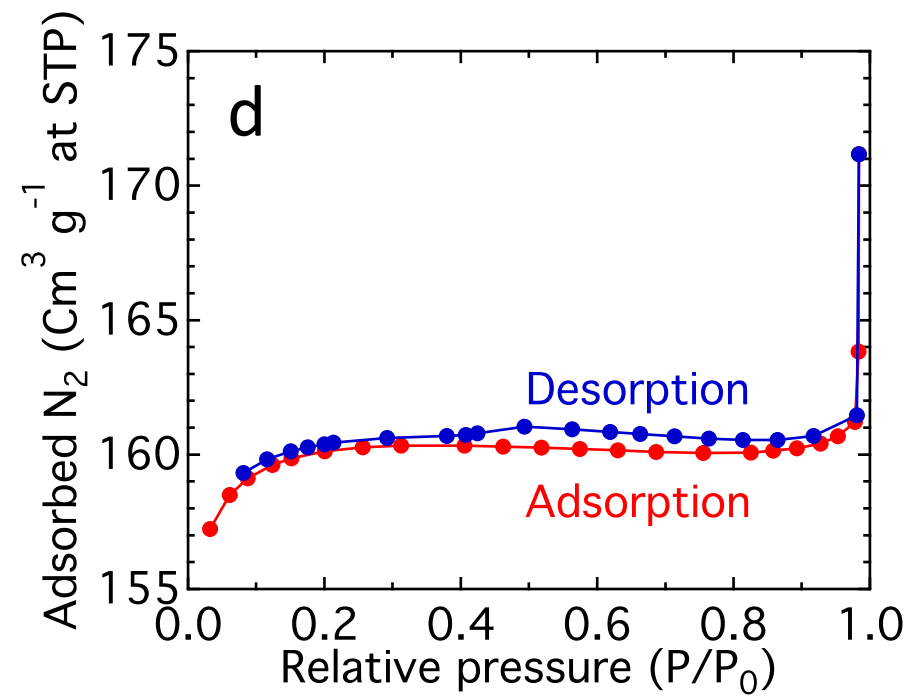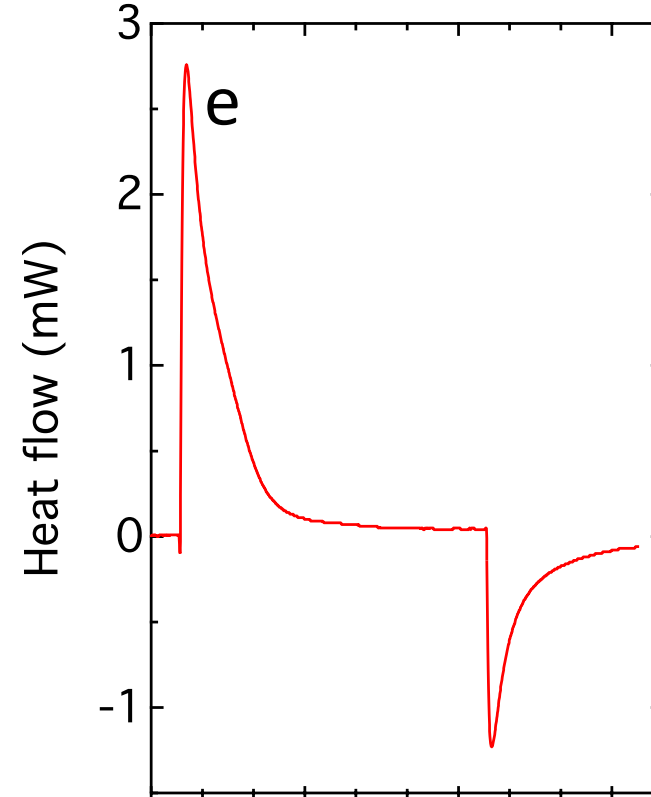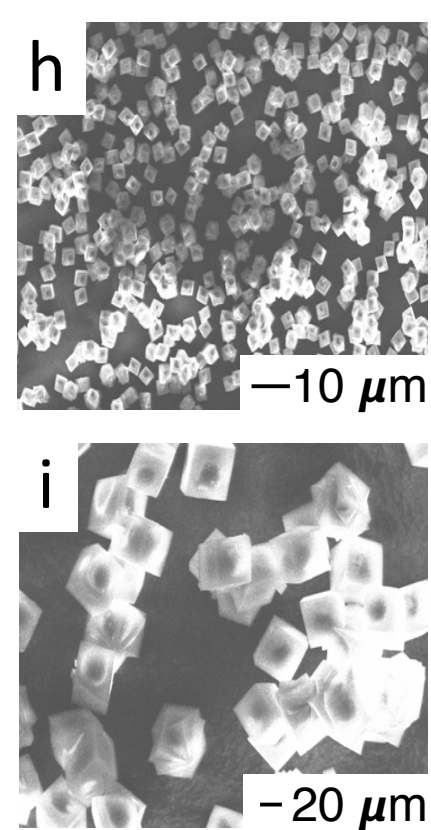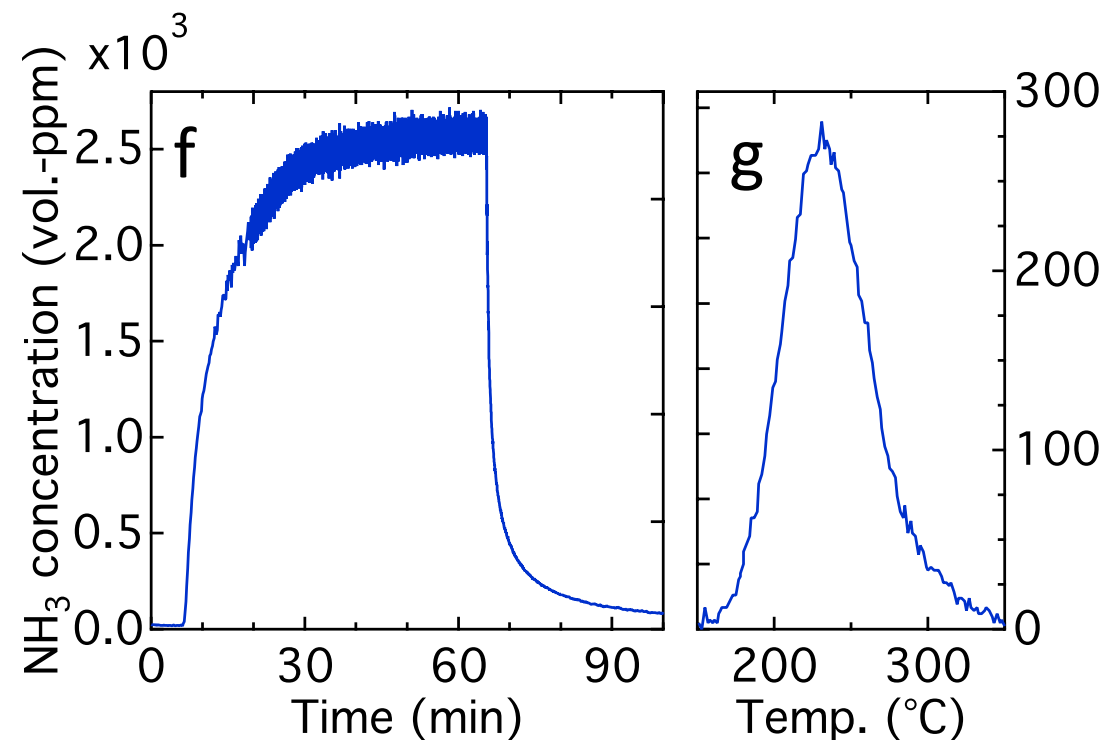

Supplement: c8ra08038k1.zip [file c8ra08038k1.zip]

Intensity (a. u.)

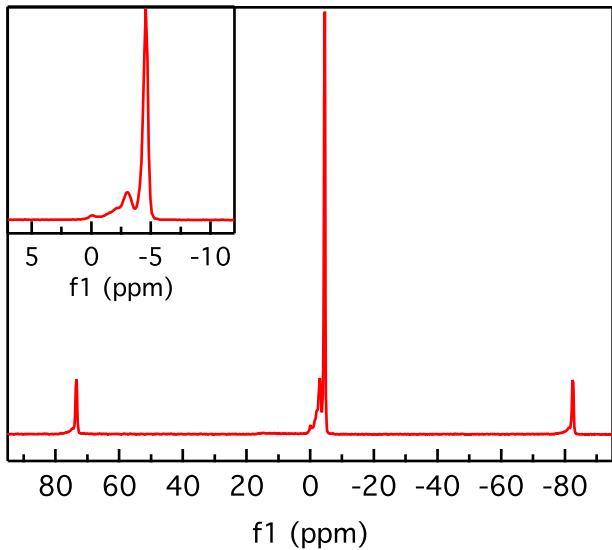

Supplement: c8ra08038k1.zip [file c8ra08038k1.zip]

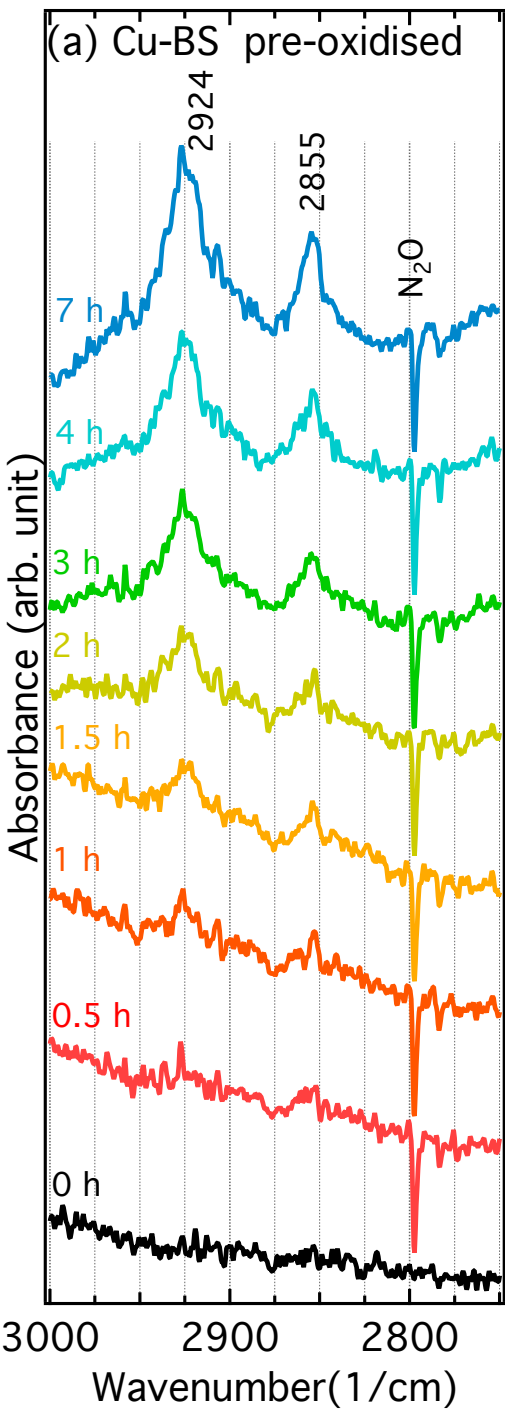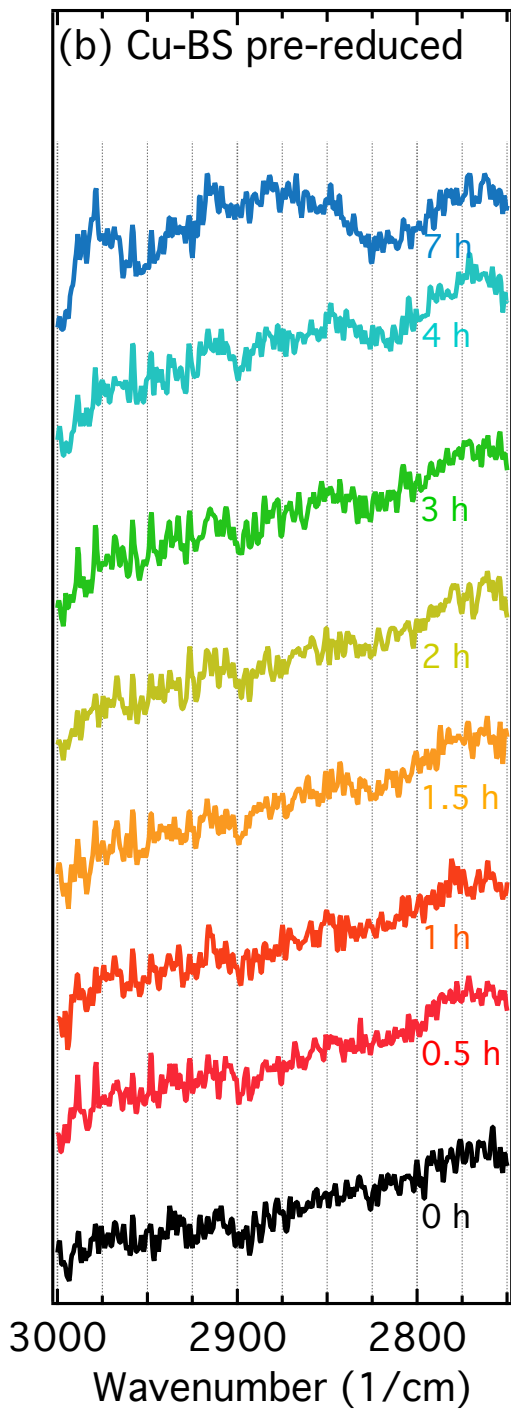

Supplement: c8ra08038k1.zip [file c8ra08038k1.zip]
